# Supplementary material for: Selection by UV Mutagenesis and Physiological Characterization of Mutant Strains of the Yeast Saprochaete suaveolens (Former Geotrichum fragrans) with Higher Capacity to Produce Flavor Compounds
Source: MDPI journal article supplement (doi:10.3390/jof7121031), 2021-11-30
Supplement: s1 [file s1]

## Supplementary data

**Figure S1.** Cattell's scree diagram (A) based on the eigenvalues and the cumulative variability (B) obtained for principal component analysis of VOCs produced by the wild-type and the UV-generated mutants of *S. suaveolens*

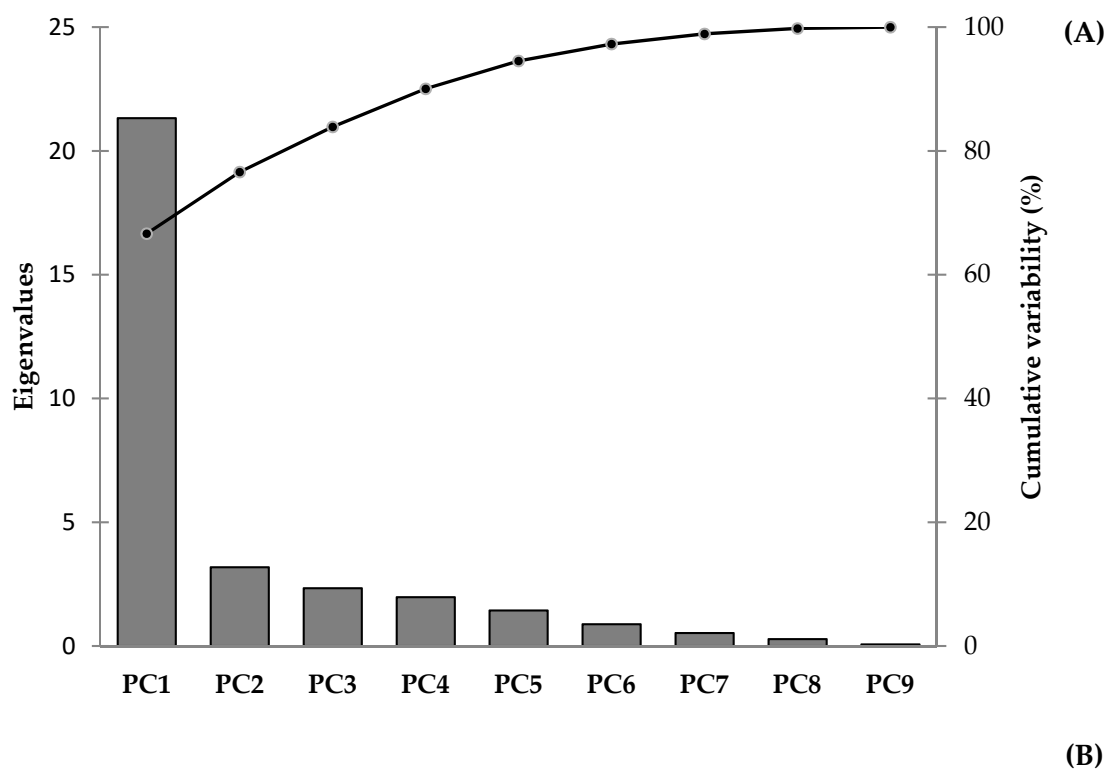

|                                   | PC1    | PC2    | PC3    | PC4    | PC5    | PC6    | PC7    | PC8    | PC9     |
|-----------------------------------|--------|--------|--------|--------|--------|--------|--------|--------|---------|
| <b>Eigenvalues</b>                | 21,325 | 3,184  | 2,335  | 1,970  | 1,435  | 0.879  | 0.523  | 0.280  | 0.068   |
| <b>Variability (%)</b>            | 66,641 | 9,951  | 7,297  | 6,157  | 4,484  | 2,747  | 1,635  | 0.875  | 0.212   |
| <b>Cumulative variability (%)</b> | 66,641 | 76,593 | 83,890 | 90,047 | 94,531 | 97,278 | 98,913 | 99,788 | 100.000 |

**Table S1.** Correlation data between VOCs and principle component obtained for principal component analysis of VOCs produced by the wild-type and the UV-generated mutants of *S. suaveolens*

| ID n° | Compound                             | PC1    | PC2    | PC3    | PC4    | PC5    |
|-------|--------------------------------------|--------|--------|--------|--------|--------|
| 1     | 2-phenylethanol                      | -0.134 | 0.257  | 0.788  | -0.013 | 0.073  |
| 2     | 2-methylbutyl 2-methylbut-2Z-enoate  | -0.278 | -0.149 | 0.102  | 0.820  | 0.159  |
| 3     | 2-methylbutyl 2-methylbutanoate      | 0.925  | -0.152 | -0.100 | -0.083 | -0.183 |
| 4     | 2-methylbutyl 3-methylbutanoate      | 0.939  | 0.003  | 0.200  | 0.122  | -0.223 |
| 5     | 2-methylbutyl acetate                | 0.962  | -0.210 | 0.088  | -0.024 | -0.034 |
| 6     | 2-methylbutyl butanoate              | 0.941  | -0.127 | 0.173  | 0.094  | -0.221 |
| 7     | 2-methylbutyl propanoate             | 0.841  | 0.425  | -0.304 | -0.085 | -0.082 |
| 8     | 2-methylpropyl 2-methylbut-2E-enoate | 0.886  | -0.152 | -0.285 | 0.266  | 0.088  |
| 9     | 2-methylpropyl 2-methylbut-2Z-enoate | 0.718  | 0.076  | 0.478  | -0.098 | 0.416  |
| 10    | 2-methylpropyl 2-methylbutanoate     | 0.940  | -0.021 | -0.090 | 0.040  | 0.000  |
| 11    | 2-methylpropyl 3-methylbutanoate     | 0.943  | -0.187 | 0.001  | 0.052  | 0.034  |
| 12    | 2-methylpropyl acetate               | 0.954  | -0.090 | 0.203  | 0.032  | -0.165 |
| 13    | 2-methylpropyl butanoate             | -0.199 | 0.002  | 0.315  | -0.551 | 0.522  |
| 14    | 2-methylpropyl propanoate            | 0.979  | -0.019 | -0.071 | 0.089  | -0.143 |
| 15    | 3-methylbutyl acetate                | 0.980  | 0.052  | -0.127 | -0.022 | -0.120 |
| 16    | 3-methylbutyl propanoate             | -0.054 | 0.921  | -0.260 | -0.119 | 0.160  |
| 17    | butyl 2-methylbut-2E-enoate          | 0.972  | -0.052 | 0.145  | -0.094 | 0.114  |
| 18    | ethyl 2-methylbut-2E-enoate          | 0.918  | 0.082  | -0.040 | 0.064  | 0.336  |
| 19    | ethyl 2-methylbutanoate              | 0.955  | 0.065  | -0.101 | -0.030 | -0.032 |
| 20    | ethyl 2-methylpropanoate             | 0.990  | -0.110 | -0.005 | -0.065 | -0.009 |
| 21    | ethyl 3-methylbutanoate              | 0.995  | -0.026 | -0.064 | -0.031 | 0.020  |
| 22    | ethyl 3-methylpentanoate             | -0.161 | 0.186  | 0.746  | 0.435  | -0.387 |
| 23    | ethyl but-2E-enoate                  | 0.935  | -0.257 | -0.052 | -0.144 | -0.022 |
| 24    | ethyl butanoate                      | -0.025 | -0.182 | -0.254 | 0.723  | 0.514  |
| 25    | ethyl octanoate                      | 0.987  | 0.052  | 0.071  | 0.031  | 0.103  |
| 26    | octyl 2-methylpropanoate             | 0.583  | 0.785  | -0.146 | 0.135  | 0.014  |
| 27    | octyl acetate                        | 0.746  | 0.392  | 0.432  | 0.002  | -0.056 |
| 28    | octyl butanoate                      | 0.042  | 0.944  | -0.153 | 0.224  | -0.122 |
| 29    | octyl propanoate                     | 0.983  | 0.073  | -0.093 | -0.120 | 0.021  |
| 30    | phenethyl 2-methylbutanoate          | 0.840  | 0.180  | 0.250  | 0.104  | 0.388  |
| 31    | propyl 2-methylbut-2E-enoate         | 0.978  | -0.197 | -0.022 | -0.010 | 0.024  |
| 32    | propyl 2-methylbutanoate             | 0.980  | -0.084 | -0.089 | 0.032  | -0.002 |

**Figure S2.** Different VOCs contribution to PC1 and PC2 axis obtained for principal component analysis of VOCs produced by the wild-type and the UV-generated mutants of *S. suaveolens*

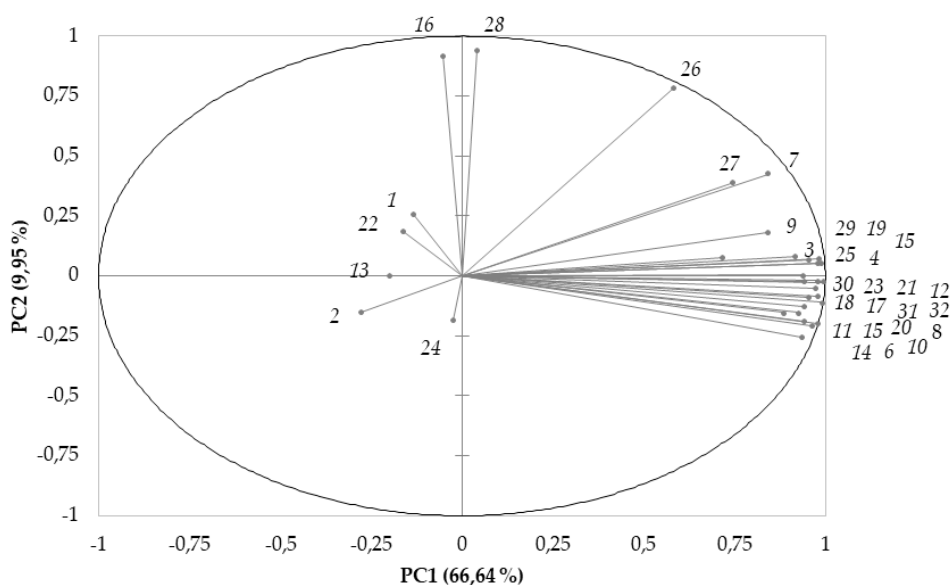

VOCs ID number : **1**: 2-phenylethanol ; **2**: 2-methylbutyl 2-methylbut-2Z-enoate; **3**: 2-methylbutyl 2-methylbutanoate ; **4**: 2-methylbutyl 3-methylbutanoate ; **5**: 2-methylbutyl acetate ; **6**: 2-methylbutyl butanoate ; **7**: 2-methylbutyl propanoate ; **8**: 2-methylpropyl 2-methylbut-2E-enoate ; **9**: 2-methylpropyl 2-methylbut-2Z-enoate ; **10**: 2-methylpropyl 2-methylbutanoate ; **11**: 2-methylpropyl 3-methylbutanoate ; **12**: 2-methylpropyl acetate ; **13**: 2-methylpropyl butanoate ; **14**: 2-methylpropyl propanoate ; **15**: 3-methylbutyl acetate ; **16**: 3-methylbutyl propanoate ; **17**: butyl 2-methylbut-2E-enoate ; **18**: ethyl 2-methylbut-2E-enoate ; **19**: ethyl 2-methylbutanoate ; **20**: ethyl 2-methylpropanoate ; **21**: ethyl 3-methylbutanoate ; **22**: ethyl 3-methylpentanoate ; **23**: ethyl but-2E-enoate ; **24**: ethyl butanoate ; **25**: ethyl octanoate ; **26**: octyl 2-methylpropanoate ; **27**: octyl acetate ; **28**: octyl butanoate ; **29**: octyl propanoate ; **30**: phenethyl 2-methylbutanoate ; **31**: propyl 2-methylbut-2E-enoate ; **32**: propyl 2-methylbutanoate
